# Supplementary material
Source: publisher site journal article supplement (https://static.cambridge.org/content/id/urn:cambridge.org:id:article:S0007114520002391/resource/name/S0007114520002391supp004.docx)
Supplement: Supplementary file 1 [file S0007114520002391supp004.docx]

Supplementary table 1. Baseline characteristics of 2,473 CVD survivors from NHANES 1999-2014 compared to 2,150 subjects excluded because of missing values. Categories were reported as number of subjects and standardized age prevalence. Continuous variables were reported by standardized age means and 95% confidence limits.

|  |  | Analytical sample N = 2,473 |  | Excluded sample |  | #Pvalue |
| --- | --- | --- | --- | --- | --- | --- |
| *Age (years) |  | 69 (60. 78) |  | 67 (59. 79) |  | 0.57 |
| Men |  | 1,448 (55.7%) |  | 1,512 (70.3%) |  |  |
| Hispanic |  | 347 (6.0%) |  | 218 (12.0%) |  | 0.13 |
| White |  | 1,512 (78.7%) |  | 1,111 (60.9%) |  |  |
| Black |  | 510 (10.8%) |  | 411 (22.5%) |  |  |
| Other or mixed ethnicity |  | 104 (4.5%) |  | 83 (4.6%) |  |  |
| Less than High School |  | 1,493 (54.0%) |  | 1,211 (75.7%) |  | ***< 0.001*** |
| Ever smoking |  | 1,544 (63.6%) |  | 1,815 (86.4%) |  | ***< 0.001*** |
| Alcohol non drinkers |  | 1,761 (69.1%) |  | 1,211 (74.9%) |  | ***0.008*** |
| ⁑Alcohol use (g/day) |  | 17.1 (15.3, 18.9) |  | 21.7 (15.9, 24.7) |  | ***< 0.001*** |
| Sedentary time (min./day) |  | 405 (395, 414) |  | 501 (405, 615) |  | ***< 0.001*** |
| Congestive heart failure |  | 753 (29.1%) |  | 511 (28.2%) |  | 0.11 |
| Coronary heart disease |  | 1,024 (43.9%) |  | 711 (39.3%) |  | 0.16 |
| Heart attack |  | 1,045 (42.9%) |  | 754 (41.6%) |  | 0.73 |
| Stroke |  | 884 (34.3%) |  | 816 (45.1%) |  | ***< 0.001*** |
| SBP (mmHg) |  | 130 (129, 131) |  | 145 (130, 150) |  | ***0.007*** |
| DBP (mmHg) |  | 67 (66, 68) |  | 66 (63, 69) |  |  |
| BMI (kg/m2) |  | 30.3 (29.9, 30.6) |  | 30.1 (29.4, 30.8) |  | 0.58 |
| BMI < 21 |  | 125 (5.2%) |  | 93 (4.7%) |  | 0.62 |
| 21 ≤ BMI < 25 |  | 434 (16.4%) |  | 358 (18.1%) |  |  |
| 25 ≤ BMI < 30 |  | 820 (32.7%) |  | 655 (33.1%) |  |  |
| BMI ≥ 30 |  | 1,094 (45.7%) |  | 871 (44.1%) |  |  |
| **Notes:** *Age reported as sample median and interquartile range, **⁑**alcohol use among users, **SBP:** Systolic Blood Pressure, **DBP:** Diastolic Blood Pressure, **BMI:** Body Mass Index**.** (unit of measure). Results were standardized considering 10 years age classes. # Student t-test or χ2 test for continuous or categorical variables | | | | | | |
